# Supplementary material
Source: MDPI journal article supplement (https://www.mdpi.com/2410-3888/9/7/279)
Supplement: s1 [file s1=3fversion=3d1720872424]

# Clinical and Histopathological Evolution of Acute Intraperitoneal Infection by *Streptococcus agalactiae* Serotypes Ib and III in Nile Tilapia

Natália Amoroso Ferrari <sup>1</sup>, Leonardo Mantovani Favero <sup>1</sup>, Cesar Toshio Facimoto <sup>1</sup>, Alais Maria Dall Agnol <sup>1</sup>, Marcos Letaif Gaeta <sup>1</sup>, Thalita Evani Silva de Oliveira <sup>2</sup>, Daniela Dib Gonçalves <sup>3</sup>, Nelson Maurício Lopera-Barrero <sup>4</sup>, Ulisses de Pádua Pereira <sup>1,\*†</sup> and Giovana Wingeter Di Santis <sup>2,†</sup>

<sup>1</sup> Laboratory of Fish Bacteriology, Department of Preventive Veterinary Medicine, State University of Londrina, Londrina 86057-970, PR, Brazil; natalia.amoroso@uel.br (N.A.F.); leonardo\_mfavero@hotmail.com (L.M.F.); cesar.facimoto@hotmail.com (C.T.F.); alaisagnol@uel.br (A.M.D.A.); mlgaeta@uel.br (M.L.G.)

<sup>2</sup> Laboratory of Animal Pathology, Department of Preventive Veterinary Medicine, State University of Londrina, Londrina 86057-970, PR, Brazil; thalitamvet@gmail.com (T.E.S.d.O.); giovanaws@uel.br (G.W.D.S.)

<sup>3</sup> Department of Preventive Veterinary Medicine and Public Health, Paranaense University, Umuarama 87502-210, PR, Brazil; danieladib@unipar.br

<sup>4</sup> Department of Animal Science, State University of Londrina, Londrina 86057-970, PR, Brazil; nmlopera@uel.br

\* Correspondence: upaduapereira@uel.br; Tel.: +55-43-3371-4259

† These authors contributed equally to this work.

**Supplementary Table S1.** Score system for histopathological analysis of Nile Tilapia experimentally infected with *Streptococcus agalactiae* serotypes Ib and III

| Organ                                          | Parameter                            | Score                                                                                                                 |
|------------------------------------------------|--------------------------------------|-----------------------------------------------------------------------------------------------------------------------|
| Eye<br>(0 to 7 total score)                    | Inflammation                         | 0 – Absent                                                                                                            |
|                                                |                                      | 1 – Rare/Mild                                                                                                         |
|                                                |                                      | 2 – Moderate                                                                                                          |
|                                                |                                      | 3 – Accentuated                                                                                                       |
|                                                | Extent and involvement of structures | 0 – Absent                                                                                                            |
|                                                |                                      | 1 - Focal Involvement                                                                                                 |
|                                                |                                      | 2 - Involvement of up to 3 structures                                                                                 |
|                                                |                                      | 3 - Involvement of more than 3 structures                                                                             |
| Central Nervous System<br>(0 to 7 total score) | Inflammation                         | 0 – Absent                                                                                                            |
|                                                |                                      | 1 – Rare/Mild                                                                                                         |
|                                                |                                      | 2 – Moderate                                                                                                          |
|                                                |                                      | 3 – Accentuated                                                                                                       |
|                                                | Extension                            | 0 – Absent                                                                                                            |
|                                                |                                      | 1 – Meningitis                                                                                                        |
|                                                |                                      | 2 - Meningitis + encephalitis or ventriculitis                                                                        |
|                                                |                                      | 3 - Meningitis + encephalitis + ventriculitis                                                                         |
| Liver<br>(1 to 6 total score)                  | Intracellular accumulations          | 0 – Absent                                                                                                            |
|                                                |                                      | 1 - Abundant glycogen storage                                                                                         |
|                                                |                                      | 2 - Slight to moderate reduction in glycogen storage                                                                  |
|                                                |                                      | 3 - Marked reduction in glycogen storage and/or moderate to marked accumulation of lipids                             |
|                                                | Inflammation                         | 0 – Absent                                                                                                            |
|                                                |                                      | 1 – Rare/Mild                                                                                                         |
|                                                |                                      | 2 – Moderate                                                                                                          |
|                                                |                                      | 3 – Accentuated                                                                                                       |
| Spleen<br>(0 to 10 total score)                | PAMS                                 | 0 - Inconspicuous PAMS                                                                                                |
|                                                |                                      | 1 - Mild presence of PAMS, generally in a single layer and with scant cytoplasm.                                      |
|                                                |                                      | 2 - Moderate presence of PAMS; two to three layers of cells with moderate to abundant cytoplasm.                      |
|                                                |                                      | 3 - Marked presence of PAMS, usually more than three layers of cells, abundant cytoplasm, PAMS occasionally coalesce. |
|                                                | PMC's                                | 4 - Marked presence of PAMS, usually more than three layers of cells, abundant cytoplasm, PAMS frequently coalesce.   |
|                                                |                                      | 0 - Absence of PMC's, may have scattered pigmented macrophages                                                        |
|                                                |                                      | 1- Infrequent PMC's, generally small; in association or not with scattered pigmented macrophages                      |
|                                                |                                      | 2 - Common PMC's, generally medium; in association or not with scattered pigmented macrophages                        |
|                                                |                                      | 3 - Frequent PMC's, generally large, in association or not with scattered pigmented macrophages.                      |
|                                                | BLM                                  | 0 - absence of BLM                                                                                                    |
|                                                |                                      | 1 - Uncommon BLM                                                                                                      |
|                                                |                                      | 2 - Common BLM                                                                                                        |
|                                                |                                      | 3 - Abundant BLM                                                                                                      |

Legend: PAMS: periarteriolar macrophage sheaths; PMC: pigmented macrophage centers/aggregates; BLM: bacteria-laden macrophages

**Supplementary Table S2.** Score analysis of the histopathological lesions of the eye of Nile tilapia experimentally infected with *Streptococcus agalactiae* serotype Ib - S13 strain. Values were the arithmetical media between the samples.

| Histopathological lesions | Time experimentally - S13 strain |     |    |    |      |      |     |     |     |      |      |
|---------------------------|----------------------------------|-----|----|----|------|------|-----|-----|-----|------|------|
|                           | 0h                               | 1h  | 3h | 6h | 9h   | 12h  | 24h | 36h | 48h | 72h* | 96h* |
| Inflammation              | 1                                | 1.5 | 1  | 1  | 1.25 | 1.33 | 1   | 2   | 2.5 | 2.33 | 3    |
| Extension                 | 2                                | 2   | 2  | 2  | 2    | 2    | 2   | 3   | 3   | 3    | 3    |
| Exudate                   | 0                                | 0   | 0  | 0  | 0    | 0    | 0   | 1   | 1   | 1    | 1    |
| Total Score               | 3                                | 3.5 | 3  | 3  | 3.25 | 3.33 | 3   | 6   | 6.5 | 6.33 | 7    |

Legend: \* indicates presence of bacteria at this collection time

**Supplementary Table S3.** Score analysis of the histopathological lesions of the eye of Nile tilapia experimentally infected with *Streptococcus agalactiae* serotype III – S73 strain. Values were the arithmetical media between the samples.

| Histopathological lesions | Time experimentally – S73 strain |    |      |      |    |     |      |      |      |      |      |
|---------------------------|----------------------------------|----|------|------|----|-----|------|------|------|------|------|
|                           | 0h                               | 1h | 3h   | 6h   | 9h | 12h | 24h* | 36h* | 48h* | 72h* | 96h* |
| Inflammation              | 1                                | 1  | 1.25 | 1.25 | 1  | 1   | 1.75 | 2.25 | 3    | 3    | 3    |
| Extension                 | 2                                | 2  | 1.75 | 1.75 | 2  | 2   | 2    | 3    | 3    | 3    | 3    |
| Exudate                   | 0                                | 0  | 0    | 0    | 0  | 0   | 0    | 0.5  | 0.33 | 1    | 1    |
| Total Score               | 3                                | 3  | 3    | 3    | 3  | 3   | 3.75 | 5.75 | 6.3  | 7    | 7    |

Legend: \* indicates presence of bacteria at this collection time

**Supplementary Table S4.** Score analysis of the histopathological lesions of the central nervous system of Nile tilapia experimentally infected with *Streptococcus agalactiae* serotype Ib - S13 strain. Values were the arithmetical media between the samples.

| Histopathological lesions | Time experimentally - S13 strain |     |     |      |      |     |      |     |      |      |      |     |
|---------------------------|----------------------------------|-----|-----|------|------|-----|------|-----|------|------|------|-----|
|                           | 0h                               | 1h  | 3h  | 6h   | 9h   | 12h | 24h  | 36h | 48h  | 72h* | 96h* | 7d* |
| Inflammation              | 0.5                              | 1   | 1.5 | 1.5  | 1.25 | 1   | 1    | 1   | 1.5  | 2    | 3    | 3   |
| Extension                 | 0.5                              | 1.5 | 2   | 1.75 | 2    | 1.5 | 1.75 | 2   | 1.75 | 1    | 2    | 3   |
| Exudate                   | 0                                | 0   | 0   | 0    | 0    | 0   | 0    | 0   | 0    | 0.5  | 0.5  | 1   |
| Total Score               | 1                                | 2.5 | 3.5 | 3.25 | 3.25 | 2.5 | 2.75 | 3   | 3.25 | 3.5  | 5.5  | 7   |

Legend: \* indicates presence of bacteria at this collection time

**Supplementary Table S5.** Score analysis of the histopathological lesions of the central nervous system of Nile tilapia experimentally infected with *Streptococcus agalactiae* serotype III – S73 strain. Values were the arithmetical media between the samples.

| Histopathological lesions | Time experimentally – S73 strain |     |     |     |      |      |      |      |      |      |      |
|---------------------------|----------------------------------|-----|-----|-----|------|------|------|------|------|------|------|
|                           | 0h                               | 1h  | 3h  | 6h  | 9h   | 12h  | 24h  | 36h* | 48h* | 72h* | 96h* |
| Inflammation              | 0.5                              | 0.5 | 0.5 | 0.5 | 0.66 | 0.66 | 1.25 | 1.5  | 2.5  | 2.25 | 3    |
| Extension                 | 0.5                              | 0.5 | 0.5 | 0.5 | 0.66 | 1    | 2    | 2.25 | 2    | 2.5  | 2    |
| Exudate                   | 0                                | 0   | 0   | 0   | 0    | 0    | 0    | 0.25 | 0    | 0.5  | 1    |
| Total Score               | 1                                | 1   | 1   | 1   | 1.33 | 1.66 | 3.25 | 4    | 4.5  | 5.25 | 6    |

Legend: \* indicates presence of bacteria at this collection time

**Supplementary Table S6.** Score analysis of the histopathological lesions of the liver of Nile tilapia experimentally infected with *Streptococcus agalactiae* serotype Ib - S13 strain. Values were the arithmetical media between the samples.

| Histopathological lesions | Time experimentally - S13 strain |    |    |      |      |      |      |      |     |     |     |  |
|---------------------------|----------------------------------|----|----|------|------|------|------|------|-----|-----|-----|--|
|                           | 0h                               | 1h | 3h | 6h   | 9h   | 12h  | 24h  | 36h* | 48h | 72h | 96h |  |
| Glycogen accumulation     | 1                                | 1  | 1  | 1    | 1.25 | 1.5  | 1.5  | 1.75 | 2.5 | 3   | 3   |  |
| Inflammation              | 0                                | 0  | 0  | 0.25 | 1    | 0.75 | 1.75 | 1.25 | 1   | 1.5 | 1   |  |
| Total Score               | 1                                | 1  | 1  | 1.25 | 2.25 | 2.25 | 3.25 | 3    | 3.5 | 4.5 | 4   |  |

Legend: \* indicates presence of bacteria at this collection time

**Supplementary Table S7.** Score analysis of the histopathological lesions of the liver of Nile tilapia experimentally infected with *Streptococcus agalactiae* serotype III – S73 strain. Values were the arithmetical media between the samples.

| Histopathological lesions | Time experimentally – S73 strain |    |      |      |     |      |      |     |     |     |     |
|---------------------------|----------------------------------|----|------|------|-----|------|------|-----|-----|-----|-----|
|                           | 0h                               | 1h | 3h   | 6h   | 9h  | 12h* | 24h* | 36h | 48h | 72h | 96h |
| Glycogen accumulation     | 1                                | 1  | 1.25 | 1.5  | 1.5 | 1.5  | 2    | 2   | 2.5 | 2.5 | 3   |
| Inflammation              | 0                                | 0  | 0.75 | 0.75 | 1   | 1.5  | 1    | 1   | 1   | 1.5 | 1.5 |
| Total Score               | 1                                | 1  | 2    | 2.25 | 2.5 | 3    | 3    | 3   | 3.5 | 4   | 4.5 |

Legend: \* indicates presence of bacteria at this collection time

**Supplementary Table S8.** Score analysis of the histopathological lesions of the spleen of Nile tilapia experimentally infected with *Streptococcus agalactiae* serotype Ib - S13 strain. Values were the arithmetical media between the samples.

| Histopathological lesions                | Time experimentally - S13 strain |      |     |      |     |      |      |      |      |      |      |
|------------------------------------------|----------------------------------|------|-----|------|-----|------|------|------|------|------|------|
|                                          | 0h                               | 1h*  | 3h* | 6h*  | 9h* | 12h* | 24h* | 36h* | 48h* | 72h* | 96h* |
| Periarteriolar macrophage sheaths        | 0.25                             | 0.75 | 1   | 2.25 | 2.5 | 3.25 | 3    | 3.75 | 3.5  | 1.75 | 2    |
| Pigmented macrophage centers/ aggregates | 1.5                              | 2.25 | 3   | 2.75 | 3   | 2.25 | 2,5  | 2    | 2.5  | 2.25 | 2.66 |
| Bacteria-laden macrophages               | 0                                | 0.5  | 0.5 | 1,75 | 2   | 2.5  | 2.25 | 2,5  | 1.5  | 1    | 1.33 |
| Total Score                              | 1,75                             | 3,5  | 4,5 | 6,75 | 7,5 | 8    | 7,75 | 8,25 | 7,5  | 5    | 6    |

Legend: \* indicates presence of bacteria at this collection time

**Supplementary Table S9.** Score analysis of the histopathological lesions of the spleen of Nile tilapia experimentally infected with *Streptococcus agalactiae* serotype III – S73 strain. Values were the arithmetical media between the samples.

| Histopathological lesions                | Time experimentally – S73 strain |     |      |     |     |      |      |      |      |      |      |
|------------------------------------------|----------------------------------|-----|------|-----|-----|------|------|------|------|------|------|
|                                          | 0h                               | 1h* | 3h*  | 6h* | 9h* | 12h* | 24h* | 36h* | 48h* | 72h* | 96h* |
| Periarteriolar macrophage sheaths        | 0.25                             | 0.5 | 1.25 | 2   | 3   | 3    | 2.5  | 3.25 | 2.25 | 2.25 | 2.75 |
| Pigmented macrophage centers/ aggregates | 1.5                              | 2   | 3    | 2   | 2   | 2    | 2.75 | 2.5  | 2.75 | 2.25 | 2.5  |
| Bacteria-laden macrophages               | 0                                | 0   | 0.75 | 1.5 | 2   | 3    | 2.25 | 2.5  | 2.25 | 1.75 | 1    |
| Total Score                              | 1.75                             | 2.5 | 5    | 5.5 | 7   | 8    | 7.5  | 8.25 | 7.25 | 6.75 | 6.25 |

Legend: \* indicates presence of bacteria at this collection time

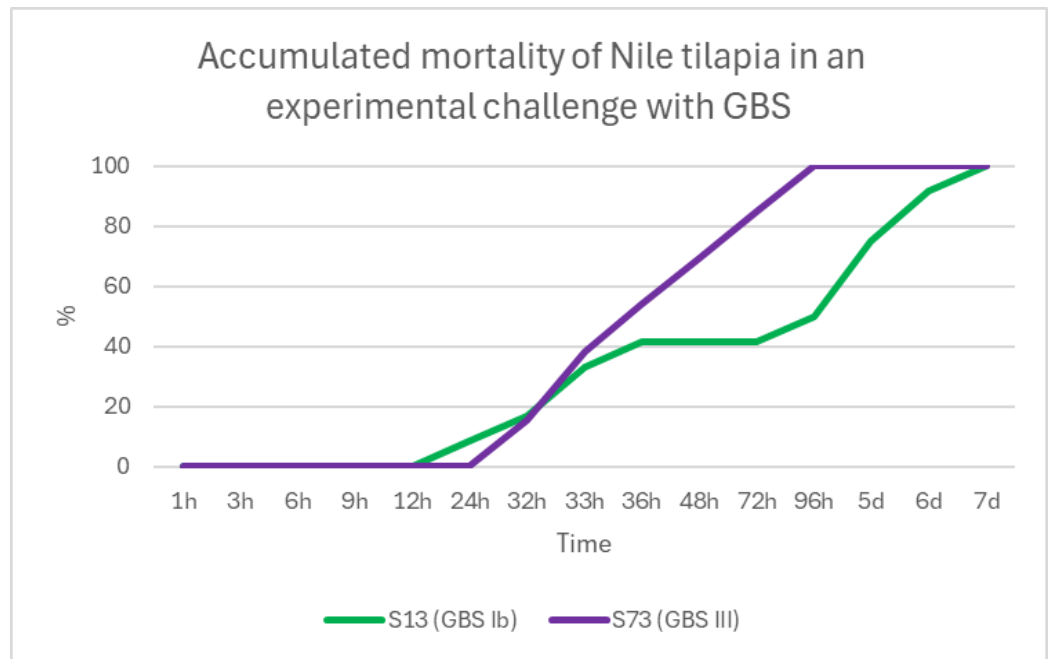

**Supplementary Figure S1.** Mortality observed in experimental infection with Group B *Streptococcus agalactiae* serotypes Ib (S13 strain) and III (S73 strain) in Nile tilapia.
